# Supplementary material
Source: PubMed Central journal article supplement (PMC536027)

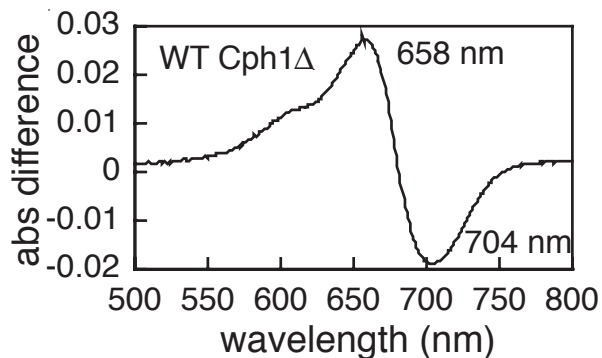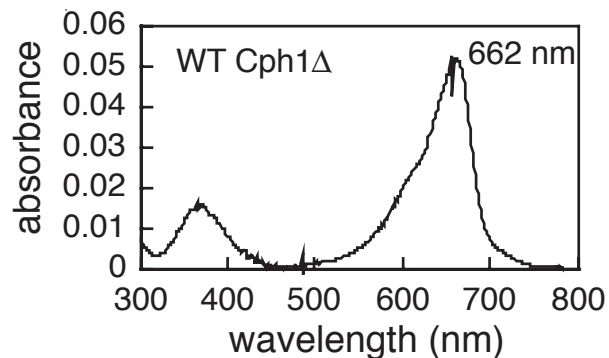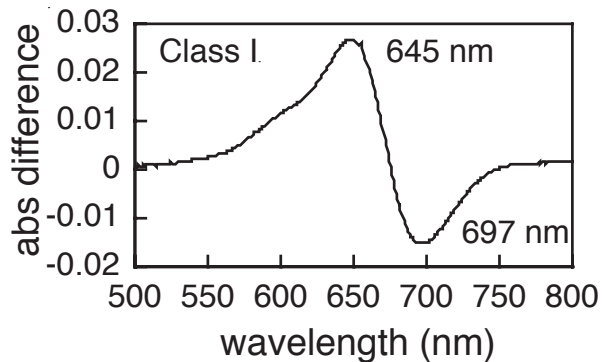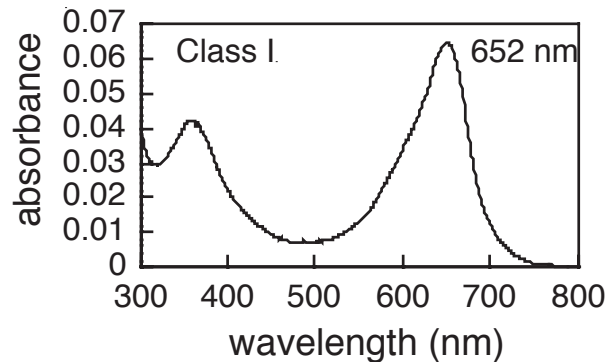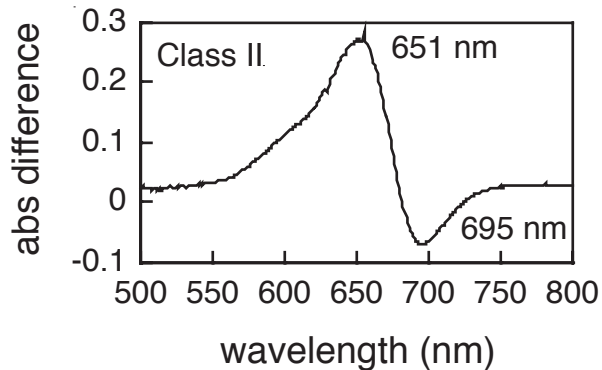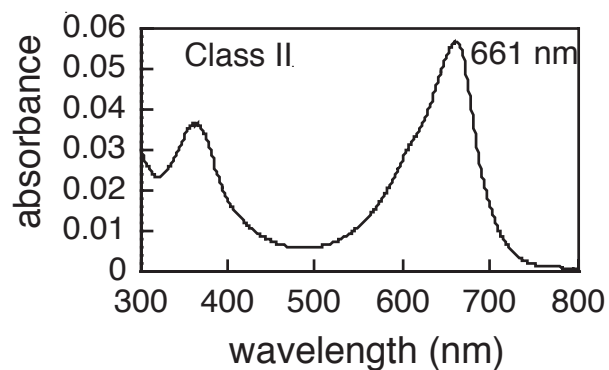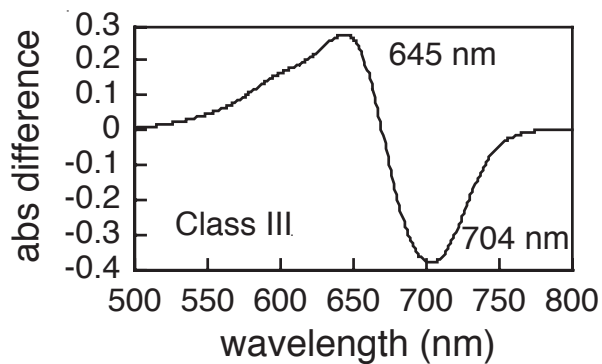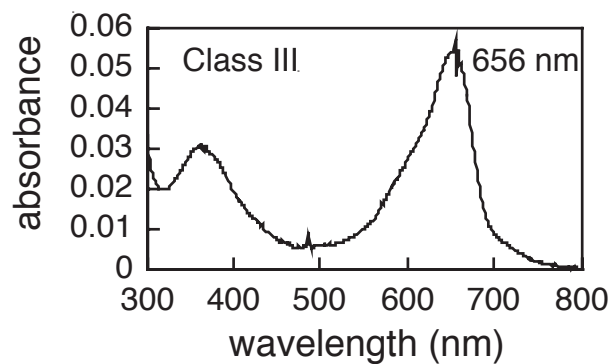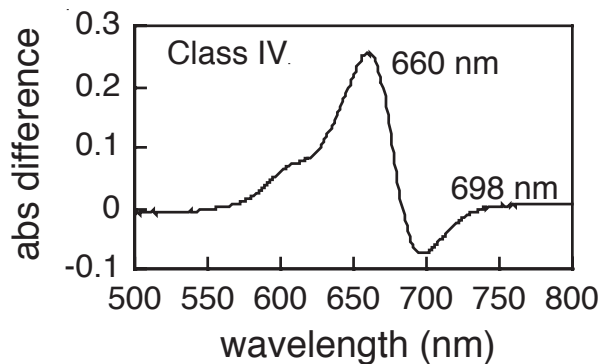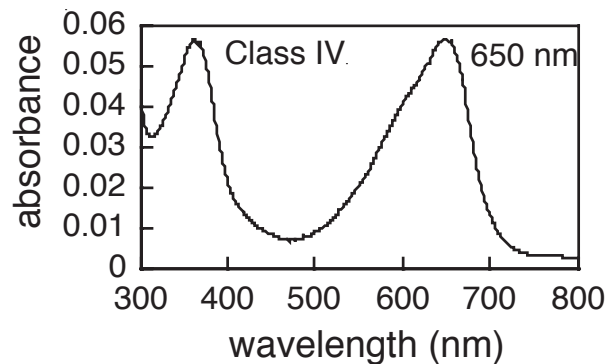

Supplement: pnas_101_50_17334__1.pdf [file pnas_101_50_17334__1.pdf]

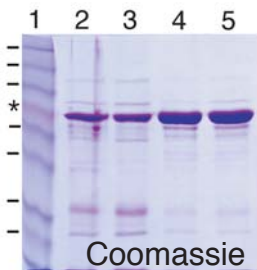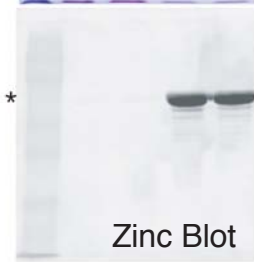

Supplement: pnas_101_50_17334__3.pdf [file pnas_101_50_17334__3.pdf]
